# Supplementary material for: Improved Therapeutic Delivery Targeting Clinically Relevant Orthotopic Human Pancreatic Tumors Engrafted in Immunocompromised Pigs Using Ultrasound-Induced Cavitation: A Pilot Study
Source: MDPI journal article supplement (doi:10.3390/pharmaceutics15061585), 2023-05-24

# **Improved therapeutic delivery targeting clinically relevant orthotopic human pancreatic tumors in pig models using ultrasound-induced cavitation**

Khan Mohammad Imran<sup>1,2</sup>, Benjamin Tintera<sup>2</sup>, Holly A. Morrison<sup>2</sup>, Juselyn D. Tupik<sup>2</sup>, Margaret A. Nagai-Singer<sup>2</sup>, Hannah Ivester<sup>1</sup>, McAlister Council-Troche<sup>2</sup>, Michael Edwards<sup>3</sup>, Sheryl Coutermarsh-Ott<sup>2</sup>, Christopher Byron<sup>4</sup>, Sherrie Clark-Deener<sup>4</sup>, Kyungjun Uh<sup>5</sup>, Kiho Lee<sup>5</sup> Paul Boulos<sup>6</sup>, Cliff Rowe<sup>6</sup>, Christian Coviello<sup>6</sup>, Irving C. Allen<sup>1,2\*</sup>

## Supplemental data

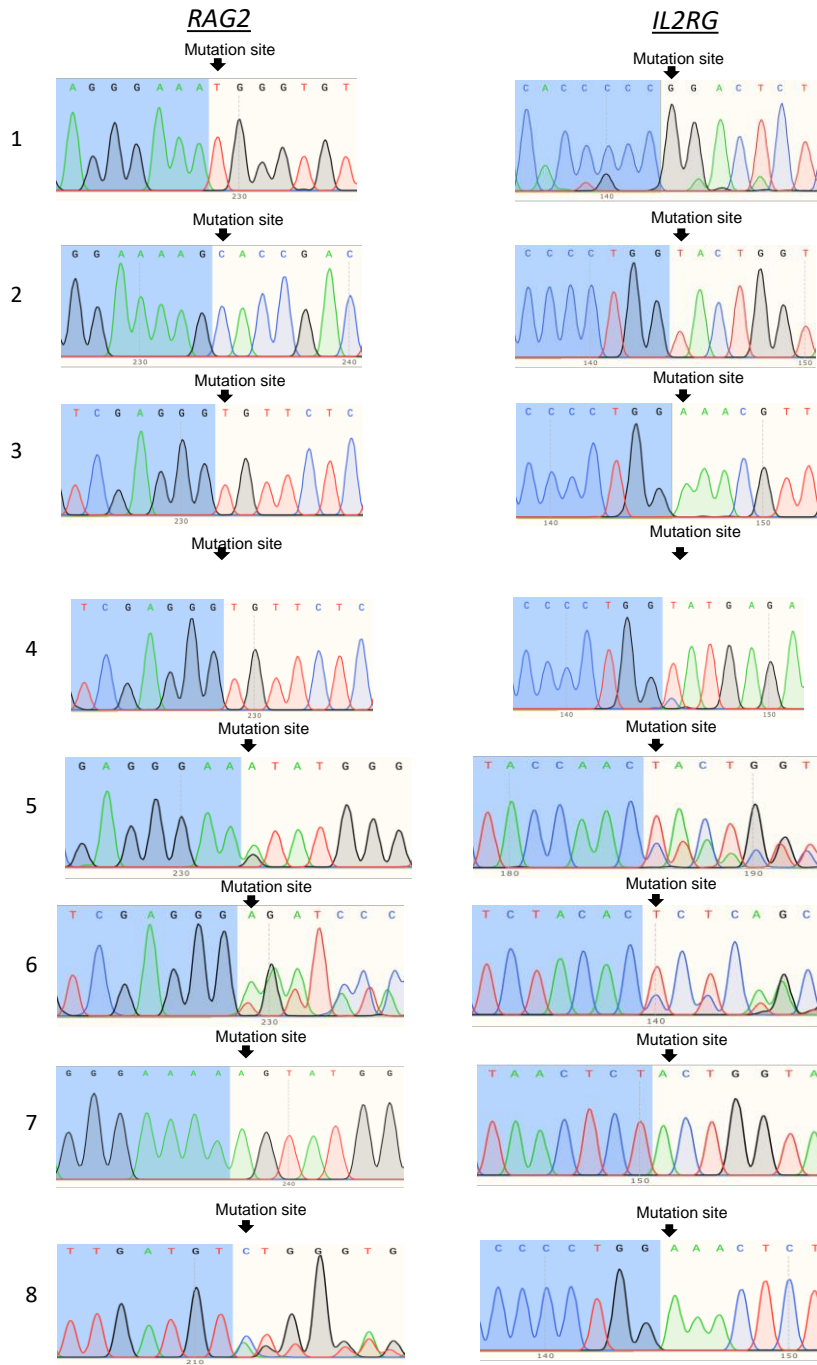

**Supplemental Figure S1. Genotyping of piglets carrying modified *RAG2* and *IL2RG* genes.**

| Analyte                                                                | Parent Ion<br>(amu)         | Product Ion<br>(amu) | Cone Energy<br>(V) | Collision<br>Energy (eV) | Quant/Qual<br>Transition |
|------------------------------------------------------------------------|-----------------------------|----------------------|--------------------|--------------------------|--------------------------|
| Gemcitabine                                                            | 264.0<br>[M+H] <sup>+</sup> | 111.9                | 38                 | 16                       | Quantifier               |
|                                                                        | 264.0<br>[M+H] <sup>+</sup> | 87.0                 | 38                 | 28                       | Qualifier 1              |
| <sup>13</sup> C, <sup>15</sup> N <sub>2</sub> -<br>Gemcitabine<br>(IS) | 267.1<br>[M+H] <sup>+</sup> | 115.0                | 42                 | 20                       | Quantifier               |
| Paclitaxel                                                             | 854.4<br>[M+H] <sup>+</sup> | 286.1                | 26                 | 20                       | Quantifier               |
|                                                                        | 854.4<br>[M+H] <sup>+</sup> | 569.2                | 26                 | 13                       | Qualifier 1              |
| Paclitaxel-d5<br>(IS)                                                  | 859.9<br>[M+H] <sup>+</sup> | 291.2                | 26                 | 20                       | Quantifier               |
|                                                                        | 859.9<br>[M+H] <sup>+</sup> | 509.2                | 26                 | 16                       | Qualifier 1              |

**Supplemental figure S2.** MRM transitions and specific mass spectrometry tuning parameters for the quantification of gemcitabine and paclitaxel.

Supplemental Figure S3. SonoTran-mediated cavitation treatment of pancreatic tumors.

A) Target treatment in pancreas tissue – First Pig Treated

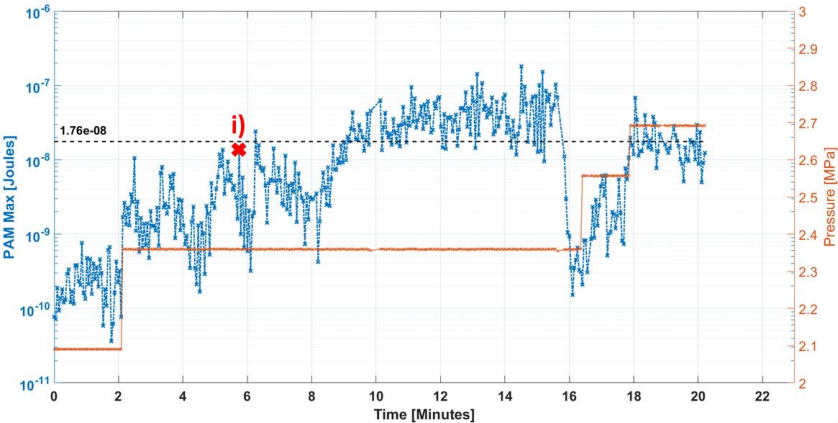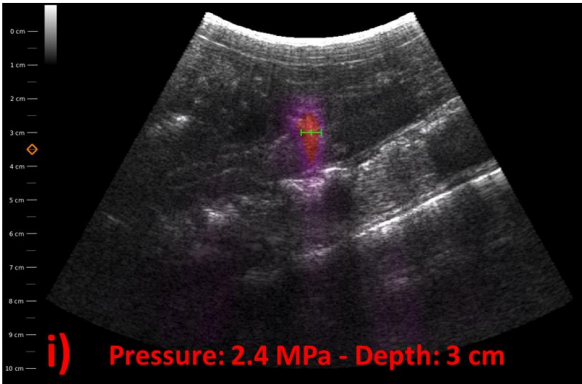

B) Target treatment in pancreas tissue – 2nd Pig Treated

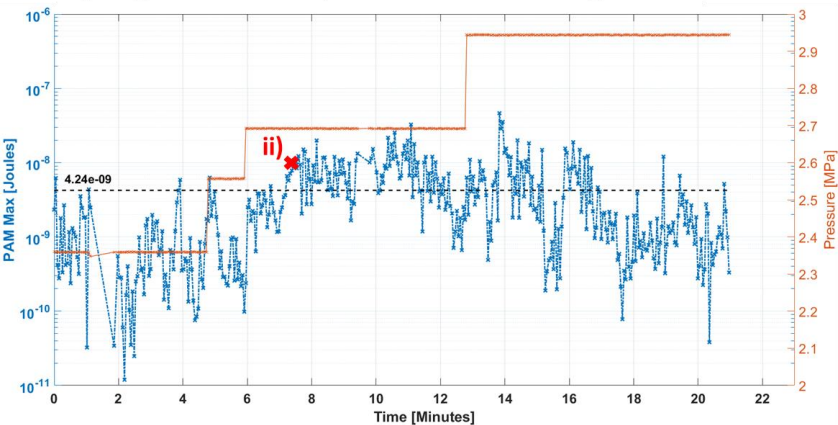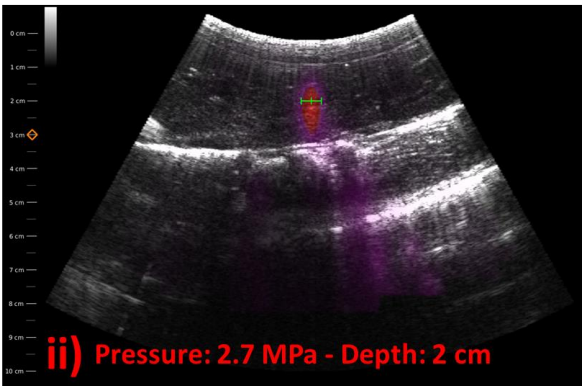

C) Target treatment in pancreas tissue – 3rd Pig Treated

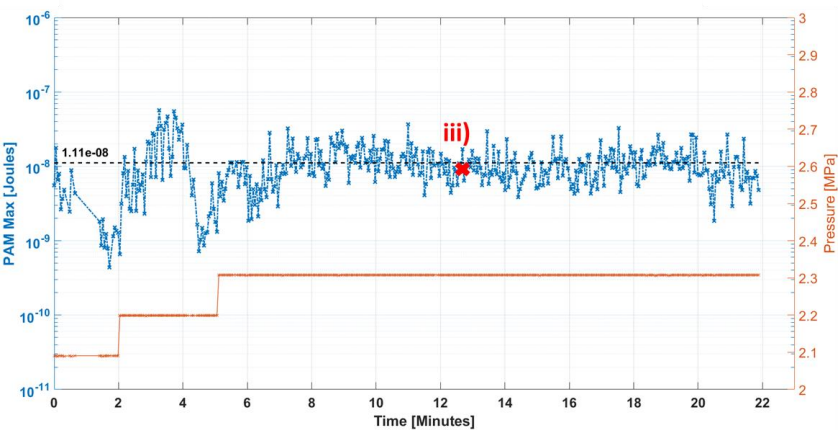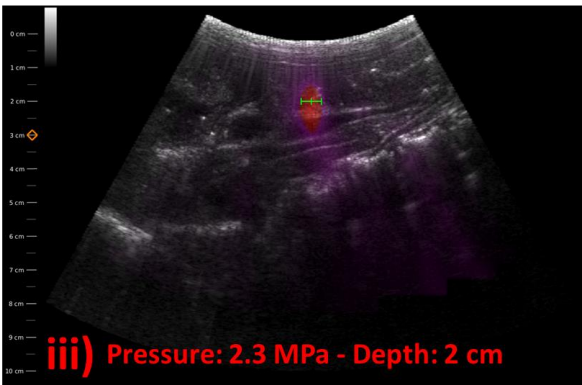

Supplement: s1 [file s1]
